# Supplementary material
Source: publisher site journal article supplement (https://www.spandidos-publications.com/8233/downloadSupplementary)
Supplement: Supplementary file [file downloadSupplementary]

**Table SI.** Univariate analysis of positivity versus negativity of *EBNA-1*, *LMP-1* and both genes.

| <b>A, <i>EBNA-1</i> status</b> |                |                   |                         |                          |
|--------------------------------|----------------|-------------------|-------------------------|--------------------------|
| <b>Risk factors</b>            | <b>P-value</b> | <b>Odds ratio</b> | <b>95% CI lower ADR</b> | <b>95% CI higher ADR</b> |
| Mouth ulcer                    | 0.014          | 0.952             | 0.916                   | 0.990                    |
| Alcohol consumption            | 0.192          | 0.975             | 0.939                   | 1.031                    |
| Sexual intercourse             | 0.055          | 0.964             | 0.928                   | 1.001                    |
| Soft drink consumption         | <0.001         | 1.094             | 1.052                   | 1.139                    |
| Age group 3-10 years           | 0.001          | 2.401             | 1.402                   | 4.112                    |
| Age group 11-20 years          | <0.001         | 5.273             | 2.606                   | 10.667                   |
| Age group 21-30 years          | <0.001         | 5.426             | 2.870                   | 10.257                   |
| Age group 31-40 years          | 0.077          | 1.658             | 0.947                   | 2.902                    |
| Age group 41-50 years          | <0.001         | 2.833             | 1.583                   | 5.056                    |
| <b>B, <i>LMP-1</i> status</b>  |                |                   |                         |                          |
| <b>Risk factors</b>            | <b>P-value</b> | <b>Odds ratio</b> | <b>95% CI lower ADR</b> | <b>95% CI higher ADR</b> |
| Sex                            | <0.001         | 1.860             | 1.300                   | 2.661                    |
| Betel nut chewing              | 0.008          | 0.441             | 0.241                   | 0.808                    |
| Alcohol consumption            | <0.001         | 2.748             | 1.908                   | 3.958                    |
| Smoking status                 | 0.048          | 1.669             | 1.006                   | 2.769                    |
| Sexual intercourse             | 0.002          | 1.758             | 1.226                   | 2.520                    |
| Hot tea consumption            | 0.006          | 1.762             | 1.177                   | 2.637                    |
| Soft drink consumption         | 0.058          | 0.696             | 0.478                   | 1.013                    |
| Age group 11-20 years          | <0.001         | 0.174             | 0.075                   | 0.403                    |
| Age group 41-50 years          | 0.138          | 0.636             | 0.350                   | 1.156                    |
| <b>C, Both genes</b>           |                |                   |                         |                          |
| <b>Risk factors</b>            | <b>P-value</b> | <b>Odds ratio</b> | <b>95% CI lower ADR</b> | <b>95% CI higher ADR</b> |
| 2 sexual partners              | 0.245          | 1.386             | 0.799                   | 2.403                    |
| 4 children                     | 0.169          | 1.708             | 0.796                   | 3.664                    |
| Betel nut chewing              | 0.155          | 0.504             | 0.196                   | 1.295                    |
| Alcohol consumption            | 0.020          | 1.787             | 1.096                   | 2.913                    |
| Smoking status                 | 0.002          | 2.519             | 1.405                   | 4.517                    |
| Sexual intercourse             | 0.153          | 1.433             | 0.875                   | 2.349                    |
| Hot tea consumption            | 0.079          | 1.583             | 0.948                   | 2.549                    |
| Coffee consumption             | 0.369          | 1.315             | 0.724                   | 2.390                    |
| Age group 31-40 years          | 0.674          | 0.838             | 0.367                   | 1.914                    |

*EBNA-1*, Epstein-Barr nuclear antigen-1; *LMP-1*, latent membrane protein-1; ADR, average daily rate.

**Table SII.** Percentage of exposure to risk factors of oral cancer across age groups.

| Risk factor                                     | 3-10<br>years | 11-20<br>years | 21-30<br>years | 31-40<br>years | 41-50<br>years | 51-90<br>years |
|-------------------------------------------------|---------------|----------------|----------------|----------------|----------------|----------------|
| Sex (male)                                      | 59            | 57             | 100            | 59             | 27             | 36             |
| <i>EBNA-1</i> positive                          | 56            | 34             | 19             | 19             | 43             | 31             |
| <i>LMP-1</i> positive                           | 32            | 33             | 73             | 35             | 38             | 43             |
| Both <i>EBNA-1</i> and <i>LMP-1</i><br>positive | 12            | 10             | 13             | 8              | 20             | 14             |
| >1 children                                     | 0             | 0              | 0              | 83             | 53             | 0              |
| >1 sexual partner                               | 0             | 0              | 0              | 0              | 1              | 0              |
| Sexual activity                                 | 0             | 11             | 54             | 90             | 87             | 95             |
| Congenital disease                              | 2             | 4              | 0              | 6              | 5              | 38             |
| Family history of cancer                        | 3             | 0              | 0              | 9              | 7              | 12             |
| Betel nut chewing                               | 1             | 39             | 0              | 3              | 15             | 0              |
| Mouth ulcers                                    | 22            | 55             | 68             | 48             | 13             | 38             |
| Alcohol consumption                             | 0             | 2              | 69             | 79             | 59             | 61             |
| Smoking                                         | 0             | 2              | 18             | 16             | 21             | 28             |
| Tea consumption                                 | 17            | 11             | 47             | 14             | 24             | 62             |
| Coffee consumption                              | 0             | 0              | 0              | 44             | 61             | 0              |
| Soft drink consumption                          | 99            | 50             | 0              | 43             | 0              | 0              |
| Herbal tea consumption                          | 0             | 0              | 0              | 19             | 0              | 0              |

*EBNA-1*, Epstein-Barr nuclear antigen-1; *LMP-1*, latent membrane protein-1.
